# Supplementary material for: Exploring the electronic states of the hydroxyl dication OH2+: thermodynamic (meta)stability, bound-free emission spectra, and charge transfer processes
Source: Royal Society of Chemistry journal article supplement (doi:10.1039/d1cp01695d), 2021-01-01
Supplement: d1cp01695d1.pdf [file d1cp01695d1.pdf]

Table S3. Total energies (in a.u.) as function of the internuclear distances (in  $a_0$ ) for the potential energy curves of the  $\Lambda + S$  states of  $\text{OH}^+$ .

| R    | X $^3\Sigma^+$ | 1 $^1\Delta$ | 1 $^3\Pi$    | 1 $^1\Sigma^+$ | 1 $^1\Pi$    |
|------|----------------|--------------|--------------|----------------|--------------|
| 1.20 | -74.90935398   | -74.82936749 | -74.74399057 | -74.77480887   | -74.63782677 |
| 1.30 | -75.01350719   | -74.93374970 | -74.85141752 | -74.87945492   | -74.74971321 |
| 1.40 | -75.08389375   | -75.00428938 | -74.92536504 | -74.95022849   | -74.82810188 |
| 1.50 | -75.13061156   | -75.05109827 | -74.97594508 | -74.99724461   | -74.88304405 |
| 1.60 | -75.16063334   | -75.08116031 | -75.01012523 | -75.02749249   | -74.92144561 |
| 1.70 | -75.17884126   | -75.09936589 | -75.03276239 | -75.04586927   | -74.94810528 |
| 1.80 | -75.18869387   | -75.10918080 | -75.04727225 | -75.05585075   | -74.96638818 |
| 1.90 | -75.19265861   | -75.11307605 | -75.05606567 | -75.05991666   | -74.97866567 |
| 2.00 | -75.19250114   | -75.11281956 | -75.06084484 | -75.05984197   | -74.98661454 |
| 2.10 | -75.18948955   | -75.10968070 | -75.06281247 | -75.05690129   | -74.99142707 |
| 2.20 | -75.18453857   | -75.10457401 | -75.06282241 | -75.05201341   | -74.99395919 |
| 2.30 | -75.17831038   | -75.09816317 | -75.06148412 | -75.04584677   | -74.99483032 |
| 2.40 | -75.17128448   | -75.09092859 | -75.05923485 | -75.03888633   | -74.99449206 |
| 2.50 | -75.16380650   | -75.08321765 | -75.05638938 | -75.03148449   | -74.99327582 |
| 2.80 | -75.14079352   | -75.05938515 | -75.04625439 | -75.00884447   | -74.98651452 |
| 3.20 | -75.11255288   | -75.02990701 | -75.03284394 | -74.98181577   | -74.97469683 |
| 3.50 | -75.09439520   | -75.01087109 | -75.02443579 | -74.96551820   | -74.96584236 |
| 3.70 | -75.08375624   | -74.99974006 | -75.01982863 | -74.95674322   | -74.96037277 |
| 3.90 | -75.07421070   | -74.98981580 | -75.01601869 | -74.94962170   | -74.95538409 |
| 4.10 | -75.06567104   | -74.98103772 | -75.01294945 | -74.94405441   | -74.95093675 |
| 4.20 | -75.06175025   | -74.97705701 | -75.01166643 | -74.94180204   | -74.94892545 |
| 4.30 | -75.05804749   | -74.97333655 | -75.01053530 | -74.93986839   | -74.94705722 |
| 4.40 | -75.05455218   | -74.96986729 | -75.00954236 | -74.93822350   | -74.94533126 |
| 4.50 | -75.05125410   | -74.96663981 | -75.00867503 | -74.93683619   | -74.94374534 |
| 4.60 | -75.04811815   | -74.96364461 | -75.00792062 | -74.93567529   | -74.94229622 |
| 4.70 | -75.04518243   | -74.96087231 | -75.00726688 | -74.93471075   | -74.94098035 |
| 4.80 | -75.04241620   | -74.95831329 | -75.00670228 | -74.93391458   | -74.93979029 |
| 4.90 | -75.03981049   | -74.95595776 | -75.00621608 | -74.93326132   | -74.93872067 |
| 5.00 | -75.03735749   | -74.95379552 | -75.00579844 | -74.93272825   | -74.93776425 |
| 5.10 | -75.03504946   | -74.95181684 | -75.00544048 | -74.93229566   | -74.93691412 |
| 5.20 | -75.03287905   | -74.95001100 | -75.00513422 | -74.93194630   | -74.93616155 |
| 5.30 | -75.03083925   | -74.94836789 | -75.00487259 | -74.93166617   | -74.93549872 |

|        |              |              |              |              |              |
|--------|--------------|--------------|--------------|--------------|--------------|
| 5.40   | -75.02892337 | -74.94687671 | -75.00464937 | -74.93144281 | -74.93491748 |
| 5.50   | -75.02712501 | -74.94552687 | -75.00445911 | -74.93126612 | -74.93440983 |
| 5.60   | -75.02543802 | -74.94430709 | -75.00429709 | -74.93112738 | -74.93396806 |
| 6.00   | -75.01968979 | -74.94053403 | -75.00385762 | -74.93083423 | -74.93272093 |
| 6.50   | -75.01437200 | -74.93771864 | -75.00359377 | -74.93074429 | -74.93192310 |
| 7.00   | -75.01062196 | -74.93599223 | -75.00348134 | -74.93067487 | -74.93155345 |
| 7.50   | -75.00800388 | -74.93490262 | -75.00343951 | -74.93070358 | -74.93138223 |
| 8.00   | -75.00618644 | -74.93416867 | -75.00342963 | -74.93079351 | -74.93130318 |
| 8.50   | -75.00493683 | -74.93363993 | -75.00343711 | -74.93089730 | -74.93126809 |
| 9.00   | -75.00411531 | -74.93324636 | -75.00345204 | -74.93099801 | -74.93125481 |
| 10.00  | -75.00338637 | -74.93270675 | -75.00348354 | -74.93117232 | -74.93125548 |
| 11.00  | -75.00319850 | -74.93235712 | -75.00350733 | -74.93129949 | -74.93126863 |
| 15.00  | -75.00306154 | -74.93173891 | -75.00355710 | -74.93154329 | -74.93126147 |
| 20.00  | -75.00303005 | -74.93154179 | -75.00360622 | -74.93166332 | -74.93145192 |
| 50.00  | -75.00301615 | -74.93141805 | -75.00364840 | -74.93175432 | -74.93148712 |
| 100.00 | -75.00301582 | -74.93141135 | -75.00365150 | -74.93176035 | -74.93148982 |
| 200.00 | -75.00301579 | -74.93141054 | -75.00365192 | -74.93176113 | -74.93149019 |
| 300.00 | -75.00301579 | -74.93141046 | -75.00365196 | -74.93176121 | -74.93149022 |
| 500.00 | -75.00301579 | -74.93141044 | -75.00365197 | -74.93176124 | -74.93149024 |

Table S4. Total energies (in a.u.) as function of the internuclear distances (in  $a_0$ ) for the potential energy curves of selected  $\Lambda + S$  states of  $\text{OH}^{2+}$ .

| R    | $1^2\Delta$  | $1^2\Sigma^+$ | $2^2\Sigma^+$ | $2^2\Delta$  | $1^2\Pi$     |
|------|--------------|---------------|---------------|--------------|--------------|
| 1.70 | -73.89962466 | -73.82794535  | -73.29446871  | -73.24774089 | -74.00365450 |
| 2.00 | -73.96941976 | -73.90084657  | -73.38353288  | -73.35928622 | -74.05026142 |
| 2.10 | -73.98489670 | -73.91715774  | -73.40155295  | -73.38942843 | -74.05829406 |
| 2.40 | -74.02033770 | -73.95454681  | -73.46818428  | -73.44048741 | -74.07321016 |
| 2.80 | -74.05572635 | -73.99152264  | -73.54315472  | -73.50619433 | -74.08697121 |
| 3.20 | -74.08583578 | -74.02249640  | -73.58849713  | -73.56968062 | -74.10275876 |
| 3.50 | -74.10620643 | -74.04324806  | -73.60884426  | -73.59803950 | -74.11658633 |
| 3.70 | -74.11877663 | -74.05599574  | -73.61783903  | -73.61047135 | -74.12628089 |
| 3.90 | -74.13053501 | -74.06789000  | -73.62412725  | -73.61917572 | -74.13601099 |
| 4.10 | -74.14149517 | -74.07895577  | -73.62835348  | -73.62509707 | -74.14554727 |
| 4.20 | -74.14668633 | -74.08419112  | -73.62985931  | -73.62724936 | -74.15019424 |

|        |              |              |              |              |              |
|--------|--------------|--------------|--------------|--------------|--------------|
| 4.30   | -74.15169170 | -74.08923606 | -73.63103389 | -73.62896434 | -74.15474255 |
| 4.40   | -74.15651669 | -74.09409662 | -73.63192400 | -73.63030532 | -74.15918258 |
| 4.50   | -74.16116710 | -74.09877912 | -73.63257065 | -73.63132732 | -74.16350770 |
| 4.60   | -74.16564908 | -74.10329023 | -73.63301023 | -73.63207800 | -74.16771388 |
| 4.70   | -74.16996902 | -74.10763649 | -73.63327439 | -73.63259943 | -74.17179911 |
| 4.80   | -74.17413341 | -74.11182482 | -73.63339097 | -73.63292760 | -74.17576299 |
| 4.90   | -74.17814870 | -74.11586198 | -73.63338433 | -73.63309390 | -74.17960633 |
| 5.00   | -74.18202124 | -74.11975438 | -73.63327588 | -73.63312558 | -74.18333086 |
| 5.10   | -74.18575731 | -74.12350877 | -73.63308383 | -73.63304626 | -74.18693900 |
| 5.20   | -74.18936295 | -74.12713123 | -73.63286090 | -73.63283785 | -74.19043366 |
| 5.30   | -74.19284402 | -74.13062781 | -73.63261840 | -73.63252479 | -74.19381806 |
| 5.40   | -74.19620610 | -74.13400421 | -73.63231807 | -73.63217051 | -74.19709568 |
| 5.50   | -74.19945464 | -74.13726596 | -73.63197298 | -73.63178538 | -74.20027010 |
| 5.60   | -74.20259480 | -74.14041833 | -73.63159431 | -73.63137829 | -74.20334495 |
| 6.00   | -74.21416546 | -74.15202983 | -73.62991544 | -73.62966554 | -74.21472095 |
| 6.50   | -74.22671006 | -74.16461209 | -73.62785095 | -73.62764992 | -74.22711761 |
| 7.00   | -74.23751816 | -74.17544766 | -73.62612243 | -73.62599849 | -74.23783583 |
| 7.50   | -74.24691913 | -74.18486919 | -73.62479670 | -73.62475756 | -74.24717927 |
| 8.00   | -74.25516669 | -74.19313244 | -73.62396025 | -73.62386623 | -74.25538807 |
| 8.50   | -74.26245819 | -74.20043607 | -73.62322636 | -73.62307770 | -74.26265251 |
| 9.00   | -74.26894915 | -74.20693658 | -73.62258860 | -73.62168979 | -74.26912400 |
| 10.00  | -74.28000110 | -74.21800241 | -73.62197259 | -73.61657182 | -74.28015085 |
| 11.00  | -74.28905684 | -74.22706737 | -73.62162327 | -73.62161303 | -74.28919160 |
| 15.00  | -74.31324790 | -74.25127552 | -73.68054458 | -73.67999655 | -74.31335920 |
| 20.00  | -74.32990203 | -74.26793608 | -73.69710071 | -73.69673583 | -74.33000548 |
| 50.00  | -74.35990018 | -74.29793795 | -73.72705247 | -73.72680492 | -74.35999618 |
| 100.00 | -74.36990020 | -74.30793822 | -73.73704854 | -73.73680930 | -74.36999590 |
| 200.00 | -74.37490021 | -74.31293827 | -73.74204928 | -73.74180874 | -74.37499588 |
| 300.00 | -74.37656688 | -74.31460494 | -73.74371601 | -73.74347538 | -74.37666254 |

Table S5. Total energies (in a.u.) as function of the internuclear distances (in  $a_0$ ) for the potential energy curves of selected  $\Lambda + S$  states of  $\text{OH}^{2+}$ .

| R    | $2^2\Pi$     | $3^2\Pi$     | $4^2\Pi$     | $1^2\Sigma^-$ | $2^2\Sigma^-$ |
|------|--------------|--------------|--------------|---------------|---------------|
| 1.70 | -73.71424623 | -73.16992345 | -73.09887558 | -73.90003273  | -73.29411203  |
| 2.00 | -73.81894894 | -73.31748581 | -73.26882341 | -73.97249437  | -73.38322312  |
| 2.10 | -73.84477094 | -73.36533622 | -73.30415239 | -73.98947360  | -73.40144403  |
| 2.40 | -73.90696689 | -73.48227134 | -73.40592273 | -74.02707863  | -73.45270397  |
| 2.80 | -73.96748682 | -73.58340778 | -73.51426406 | -74.06191364  | -73.57800067  |
| 3.20 | -74.01185891 | -73.64588314 | -73.57703143 | -74.09019563  | -73.65027798  |
| 3.50 | -74.03784011 | -73.67612833 | -73.60322237 | -74.10932663  | -73.68216004  |
| 3.70 | -74.05262283 | -73.69035338 | -73.61432190 | -74.12125167  | -73.69629912  |
| 3.90 | -74.06581710 | -73.70086135 | -73.62191902 | -74.13250640  | -73.70633534  |
| 4.10 | -74.07770672 | -73.70843455 | -73.62697174 | -74.14308197  | -73.71329541  |
| 4.20 | -74.08323367 | -73.71133485 | -73.62877171 | -74.14811831  | -73.71587797  |
| 4.30 | -74.08851219 | -73.71374290 | -73.63018303 | -74.15298995  | -73.71797315  |
| 4.40 | -74.09356043 | -73.71572284 | -73.63126429 | -74.15769935  | -73.71965033  |
| 4.50 | -74.09839423 | -73.71733182 | -73.63206579 | -74.16224970  | -73.72096990  |
| 4.60 | -74.10302768 | -73.71862061 | -73.63263092 | -74.16664493  | -73.72198446  |
| 4.70 | -74.10747340 | -73.71963413 | -73.63299707 | -74.17088949  | -73.72273979  |
| 4.80 | -74.11174278 | -73.72041198 | -73.63319656 | -74.17498820  | -73.72327569  |
| 4.90 | -74.11584618 | -73.72098894 | -73.63325731 | -74.17894609  | -73.72362672  |
| 5.00 | -74.11979302 | -73.72139549 | -73.63320341 | -74.18276833  | -73.72382283  |
| 5.10 | -74.12359200 | -73.72165827 | -73.63305568 | -74.18646013  | -73.72389001  |
| 5.20 | -74.12725110 | -73.72180056 | -73.63283208 | -74.19002664  | -73.72385075  |
| 5.30 | -74.13077774 | -73.72184259 | -73.63254809 | -74.19347298  | -73.72372451  |
| 5.40 | -74.13417881 | -73.72180202 | -73.63221701 | -74.19680414  | -73.72352806  |
| 5.50 | -74.13746073 | -73.72169397 | -73.63185023 | -74.20002498  | -73.72327587  |
| 5.60 | -74.14062950 | -73.72153166 | -73.63145751 | -74.20314020  | -73.72298033  |
| 6.00 | -74.15227986 | -73.72054326 | -73.62977429 | -74.21463260  | -73.72155460  |
| 6.50 | -74.16487550 | -73.71904465 | -73.62776237 | -74.22711134  | -73.71968154  |
| 7.00 | -74.17570667 | -73.71766076 | -73.62610137 | -74.23787426  | -73.71805976  |
| 7.50 | -74.18511663 | -73.71653794 | -73.62484512 | -74.24724310  | -73.71678982  |
| 8.00 | -74.19336569 | -73.71568216 | -73.62403625 | -74.25546670  | -73.71584495  |
| 8.50 | -74.20065515 | -73.71504900 | -73.62305433 | -74.26273953  | -73.71515826  |
| 9.00 | -74.20714242 | -73.71458552 | -73.62263567 | -74.26921590  | -73.71466282  |

|        |              |              |              |              |              |
|--------|--------------|--------------|--------------|--------------|--------------|
| 10.00  | -74.21818589 | -73.71399276 | -73.62204642 | -74.28024743 | -73.71403894 |
| 11.00  | -74.22723360 | -73.71365688 | -73.62170989 | -74.28928938 | -73.71369084 |
| 15.00  | -74.25140559 | -73.71317987 | -73.68010901 | -74.31345452 | -73.71320337 |
| 20.00  | -74.26805047 | -73.71305463 | -73.69680137 | -74.33009881 | -73.71307679 |
| 50.00  | -74.29803944 | -73.72604599 | -73.71313920 | -74.36008793 | -73.72606188 |
| 100.00 | -74.30803903 | -73.73629702 | -73.71309299 | -74.37008755 | -73.73626994 |
| 200.00 | -74.31303899 | -73.74142186 | -73.71307048 | -74.37508751 | -73.74137551 |
| 300.00 | -74.31470565 | -73.74313009 | -73.71306300 | -74.37675417 | -73.74307748 |

Table S6. Total energies (in a.u.) as function of the internuclear distances (in  $a_0$ ) for the potential energy curves of selected  $\Lambda + S$  states of  $\text{OH}^{2+}$ .

| R    | 1 $^4\Pi$    | 2 $^4\Pi$    | X $^4\Sigma^-$ | 2 $^4\Sigma^-$ | 3 $^4\Sigma^-$ |
|------|--------------|--------------|----------------|----------------|----------------|
| 1.70 | -73.37702036 | -73.15814026 | -74.03704189   | -73.49863113   |                |
| 2.00 | -73.48713900 | -73.36441585 | -74.10102058   | -73.59195574   | -73.27000829   |
| 2.10 | -73.51317208 | -73.41497307 | -74.11501326   | -73.61105261   | -73.33196784   |
| 2.40 | -73.57731185 | -73.52312363 | -74.14725216   | -73.64905776   | -73.47568371   |
| 2.80 | -73.64623463 | -73.59742271 | -74.18051285   | -73.67694542   | -73.59470988   |
| 3.20 | -73.69000155 | -73.64168996 | -74.20977243   | -73.69582533   | -73.66075694   |
| 3.50 | -73.70909134 | -73.66751295 | -74.22985465   | -73.70828690   | -73.68927958   |
| 3.70 | -73.71746267 | -73.68235955 | -74.24230545   | -73.71611602   | -73.70206504   |
| 3.90 | -73.72349924 | -73.69550961 | -74.25397655   | -73.72371246   | -73.71130405   |
| 4.10 | -73.72815272 | -73.70685402 | -74.26487017   | -73.73141063   | -73.71760354   |
| 4.20 | -73.73032498 | -73.71169469 | -74.27003321   | -73.73531658   | -73.71983830   |
| 4.30 | -73.73265166 | -73.71581785 | -74.27501297   | -73.73922157   | -73.72158188   |
| 4.40 | -73.73533247 | -73.71908912 | -74.27981442   | -73.74309786   | -73.72291647   |
| 4.50 | -73.73846736 | -73.72146987 | -74.28444311   | -73.74692466   | -73.72391180   |
| 4.60 | -73.74199680 | -73.72307038 | -74.28890504   | -73.75068739   | -73.72462563   |
| 4.70 | -73.74577069 | -73.72407837 | -74.29320643   | -73.75437538   | -73.72510573   |
| 4.80 | -73.74964722 | -73.72466674 | -74.29735362   | -73.75798155   | -73.72539185   |
| 4.90 | -73.75352835 | -73.72496152 | -74.30135295   | -73.76150152   | -73.72551741   |
| 5.00 | -73.75735552 | -73.72504785 | -74.30521069   | -73.76493253   | -73.72551069   |
| 5.10 | -73.76109780 | -73.72498280 | -74.30893297   | -73.76827335   | -73.72539580   |
| 5.20 | -73.76474124 | -73.72480581 | -74.31252577   | -73.77152385   | -73.72519329   |
| 5.30 | -73.76827815 | -73.72454552 | -74.31599486   | -73.77468443   | -73.72492080   |

|        |              |              |              |              |              |
|--------|--------------|--------------|--------------|--------------|--------------|
| 5.40   | -73.77170690 | -73.72422343 | -74.31934580 | -73.77775630 | -73.72460176 |
| 5.50   | -73.77502835 | -73.72385667 | -74.32258391 | -73.78074111 | -73.72423238 |
| 5.60   | -73.77824411 | -73.72345836 | -74.32571428 | -73.78364075 | -73.72383200 |
| 6.00   | -73.79011085 | -73.72173332 | -74.33725188 | -73.79443269 | -73.72208658 |
| 6.50   | -73.80296724 | -73.71967453 | -74.34976565 | -73.80629041 | -73.71997255 |
| 7.00   | -73.81401598 | -73.71798384 | -74.36055105 | -73.81661088 | -73.71821682 |
| 7.50   | -73.82360039 | -73.71669912 | -74.36993507 | -73.82565224 | -73.71687466 |
| 8.00   | -73.83198852 | -73.71576061 | -74.37816970 | -73.83362668 | -73.71589208 |
| 8.50   | -73.83938916 | -73.71508647 | -74.38545103 | -73.84070592 | -73.71518636 |
| 9.00   | -73.84596580 | -73.71460305 | -74.39193368 | -73.84702910 | -73.71468132 |
| 10.00  | -73.85713834 | -73.71399641 | -74.40297456 | -73.85783880 | -73.71405053 |
| 11.00  | -73.86627567 | -73.71365760 | -74.41202314 | -73.86673235 | -73.71370095 |
| 15.00  | -73.89061017 | -73.71317987 | -74.43619966 | -73.89062353 | -73.71321305 |
| 20.00  | -73.90731903 | -73.71305463 | -74.45284886 | -73.90716404 | -73.71308647 |
| 50.00  | -73.93735127 | -73.71299925 | -74.48284105 | -73.93708099 | -73.71303081 |
| 100.00 | -73.94735343 | -73.71299790 | -74.49284086 | -73.94707622 | -73.71302946 |
| 200.00 | -73.95235371 | -73.71299781 | -74.49784085 | -73.95207563 | -73.71302937 |
| 300.00 | -73.95402041 | -73.71299781 | -74.49950751 | -73.95374224 | -73.71302937 |

Table S7. Transition dipole moment (in a.u.) as function of the internuclear distances (in  $a_0$ ) for selected pair of  $\Lambda + S$  states of  $\text{OH}^{2+}$ .

| R    | $3^2\Pi - 2^2\Pi$ | $3^2\Pi - 1^2\Sigma^+$ | $3^2\Pi - 1^2\Sigma^-$ | $3^2\Pi - 1^2\Delta$ | $3^2\Pi - 1^2\Pi$ |
|------|-------------------|------------------------|------------------------|----------------------|-------------------|
| 2.00 | 0.14428           | 0.07152                | 0.16605                | 0.17404              | 0.17744           |
| 2.10 | 0.11140           | 0.04285                | 0.10598                | 0.14281              | 0.25026           |
| 2.40 | 0.10766           | 0.00198                | 0.03886                | 0.09912              | 0.38421           |
| 2.80 | 0.18185           | 0.02213                | 0.00687                | 0.08056              | 0.54530           |
| 3.20 | 0.27813           | 0.03281                | 0.01098                | 0.06959              | 0.61670           |
| 3.50 | 0.32371           | 0.03551                | 0.01769                | 0.06271              | 0.58587           |
| 3.70 | 0.33498           | 0.03591                | 0.01996                | 0.05872              | 0.54170           |
| 3.90 | 0.33282           | 0.03562                | 0.02108                | 0.05511              | 0.49003           |
| 4.10 | 0.32061           | 0.03486                | 0.02143                | 0.05176              | 0.43721           |
| 4.20 | 0.31184           | 0.03435                | 0.02139                | 0.05017              | 0.41156           |
| 4.30 | 0.30182           | 0.03377                | 0.02125                | 0.04861              | 0.38679           |
| 4.40 | 0.29089           | 0.03313                | 0.02102                | 0.04709              | 0.36305           |
| 4.50 | 0.27933           | 0.03243                | 0.02072                | 0.04559              | 0.34043           |

|      |         |         |         |         |         |
|------|---------|---------|---------|---------|---------|
| 4.60 | 0.26738 | 0.03169 | 0.02036 | 0.04412 | 0.31898 |
| 4.70 | 0.25525 | 0.03092 | 0.01996 | 0.04267 | 0.29870 |
| 4.80 | 0.24309 | 0.03011 | 0.01951 | 0.04124 | 0.27958 |
| 4.90 | 0.23102 | 0.02928 | 0.01902 | 0.03983 | 0.26158 |
| 5.00 | 0.21916 | 0.02842 | 0.01851 | 0.03843 | 0.24466 |
| 5.10 | 0.20756 | 0.02755 | 0.01798 | 0.03706 | 0.22877 |
| 5.20 | 0.19629 | 0.02667 | 0.01744 | 0.03570 | 0.21385 |
| 5.30 | 0.18538 | 0.02577 | 0.01688 | 0.03436 | 0.19986 |
| 5.40 | 0.17487 | 0.02487 | 0.01631 | 0.03303 | 0.18674 |
| 5.50 | 0.16477 | 0.02397 | 0.01574 | 0.03173 | 0.17443 |
| 5.60 | 0.15510 | 0.02307 | 0.01516 | 0.03045 | 0.16290 |
| 6.00 | 0.12066 | 0.01954 | 0.01288 | 0.02556 | 0.12358 |
| 6.50 | 0.08664 | 0.01545 | 0.01021 | 0.02007 | 0.08688 |
| 7.00 | 0.06122 | 0.01187 | 0.00786 | 0.01538 | 0.06056 |
| 7.50 | 0.04271 | 0.00893 | 0.00592 | 0.01155 | 0.04188 |
| 8.00 | 0.02943 | 0.00657 | 0.00436 | 0.00850 | 0.02870 |

Table S8. Transition dipole moment (in a.u.) as function of the internuclear distances (in  $a_0$ ) for selected pair of  $\Lambda + S$  states of  $\text{OH}^{2+}$ .

| R    | $3\ ^4\Sigma^- - X\ ^4\Sigma^-$ | $2\ ^4\Pi - X\ ^4\Sigma^-$ | $2\ ^2\Sigma^- - 2\ ^2\Pi$ | $2\ ^2\Sigma^- - 1\ ^2\Sigma^-$ | $2\ ^2\Sigma^- - 1\ ^2\Pi$ |
|------|---------------------------------|----------------------------|----------------------------|---------------------------------|----------------------------|
| 2.00 | 0.62012                         | 0.08392                    | 0.00096                    |                                 |                            |
| 2.10 | 0.64774                         | 0.11319                    | 0.00212                    |                                 |                            |
| 2.40 | 0.70239                         | 0.24786                    | 0.03962                    | 0.64641                         | 0.02449                    |
| 2.80 | 0.71229                         | 0.39309                    | 0.04603                    | 0.69918                         | 0.00591                    |
| 3.20 | 0.67774                         | 0.43085                    | 0.04858                    | 0.65640                         | 0.01983                    |
| 3.50 | 0.63673                         | 0.43710                    | 0.04808                    | 0.59085                         | 0.02613                    |
| 3.70 | 0.59363                         | 0.43443                    | 0.04691                    | 0.54073                         | 0.02896                    |
| 3.90 | 0.52562                         | 0.42362                    | 0.04529                    | 0.48973                         | 0.03084                    |
| 4.10 | 0.43984                         | 0.39593                    | 0.04337                    | 0.44020                         | 0.03190                    |
| 4.20 | 0.39924                         | 0.36971                    | 0.04234                    | 0.41644                         | 0.03217                    |
| 4.30 | 0.36329                         | 0.33081                    | 0.04127                    | 0.39351                         | 0.03228                    |
| 4.40 | 0.33221                         | 0.27917                    | 0.04017                    | 0.37147                         | 0.03226                    |
| 4.50 | 0.30539                         | 0.22181                    | 0.03905                    | 0.35036                         | 0.03211                    |
| 4.60 | 0.28204                         | 0.16903                    | 0.03791                    | 0.33020                         | 0.03184                    |
| 4.70 | 0.26147                         | 0.12652                    | 0.03676                    | 0.31099                         | 0.03148                    |

|      |         |         |         |         |         |
|------|---------|---------|---------|---------|---------|
| 4.80 | 0.24310 | 0.09442 | 0.03561 | 0.29273 | 0.03103 |
| 4.90 | 0.22652 | 0.07060 | 0.03445 | 0.27538 | 0.03051 |
| 5.00 | 0.21142 | 0.05287 | 0.03329 | 0.25892 | 0.02992 |
| 5.10 | 0.19756 | 0.03951 | 0.03213 | 0.24333 | 0.02927 |
| 5.20 | 0.18476 | 0.02930 | 0.03097 | 0.22857 | 0.02857 |
| 5.30 | 0.17288 | 0.02139 | 0.02983 | 0.21461 | 0.02783 |
| 5.40 | 0.16183 | 0.01522 | 0.02869 | 0.20140 | 0.02706 |
| 5.50 | 0.15150 | 0.01034 | 0.02756 | 0.18893 | 0.02626 |
| 5.60 | 0.14186 | 0.00648 | 0.02645 | 0.17714 | 0.02543 |
| 6.00 | 0.10887 | 0.00257 | 0.02218 | 0.13626 | 0.02200 |
| 6.50 | 0.07766 | 0.00643 | 0.01735 | 0.09711 | 0.01774 |
| 7.00 | 0.05481 | 0.00692 | 0.01323 | 0.06837 | 0.01384 |
| 7.50 | 0.04622 | 0.00616 | 0.00987 | 0.04758 | 0.01049 |
| 8.00 | 0.03825 | 0.00499 | 0.00722 | 0.03279 | 0.00778 |
