# Supplementary material for: Exploring the electronic states of the hydroxyl dication OH2+: thermodynamic (meta)stability, bound-free emission spectra, and charge transfer processes
Source: Royal Society of Chemistry journal article supplement (doi:10.1039/d1cp01695d), 2021-01-01
Supplement: d1cp01695d2.pdf [file d1cp01695d2.pdf]

### Supplementary Materials

**Table S1** Total Einstein spontaneous emission coefficients ( $A_{\nu}$ ) and radiative lifetimes ( $\tau$ ) for bound-free transitions from the  $3\ ^2\Pi$  state to the lower states  $2\ ^2\Pi$ ,  $1\ ^2\Sigma^+$ ,  $1\ ^2\Sigma^-$ ,  $1\ ^2\Delta$ ,  $1\ ^2\Pi$  of the  $\text{OH}^{2+}$  species.

| $\nu$ | $A_{\nu} / \text{s}^{-1}$ | $\tau / \text{ns}$ | $\lambda_{\text{max}}$ |
|-------|---------------------------|--------------------|------------------------|
| 0     | 36 511 360                | 27.39              | 129.87                 |
| 1     | 30 999 160                | 32.26              | 133.33                 |
| 2     | 25 506 420                | 39.21              | 136.05                 |
| 3     | 20 101 200                | 49.75              | 136.98                 |
| 4     | 14 959 295                | 66.85              | 137.98                 |

**Table S2** Total Einstein spontaneous emission coefficients ( $A_{\nu}$ ) and radiative lifetimes ( $\tau$ ) for bound-free transitions from the  $2\ ^2\Sigma^-$  state to the lower states  $2\ ^2\Pi$ ,  $1\ ^2\Sigma^-$ ,  $1\ ^2\Pi$  of the  $\text{OH}^{2+}$  species.

| $\nu$ | $A_{\nu} / \text{s}^{-1}$ | $\tau / \text{ns}$ | $\lambda_{\text{max}}$ |
|-------|---------------------------|--------------------|------------------------|
| 0     | 45481500                  | 21.99              | 135.13                 |
| 1     | 39104010                  | 25.58              | 139.86                 |
| 2     | 32753930                  | 30.53              | 142.86                 |
| 3     | 26485200                  | 37.76              | 143.88                 |
| 4     | 20411755                  | 48.99              | 144.93                 |

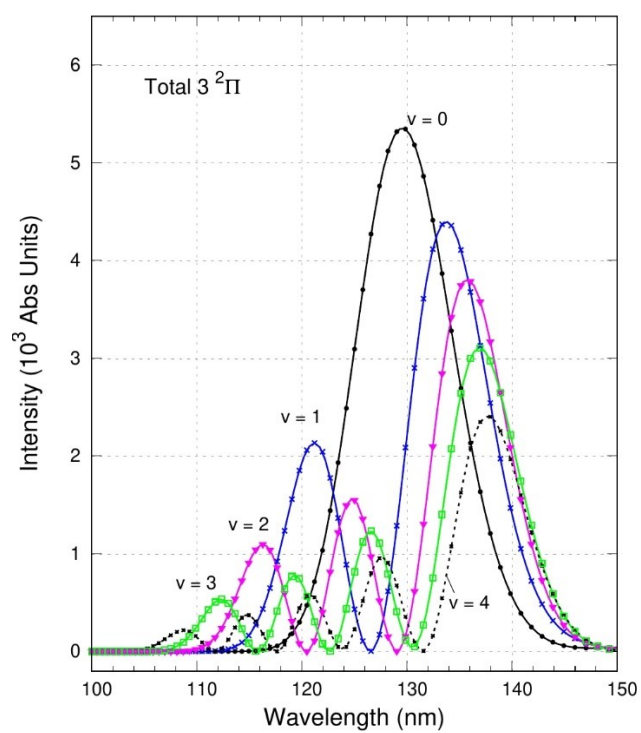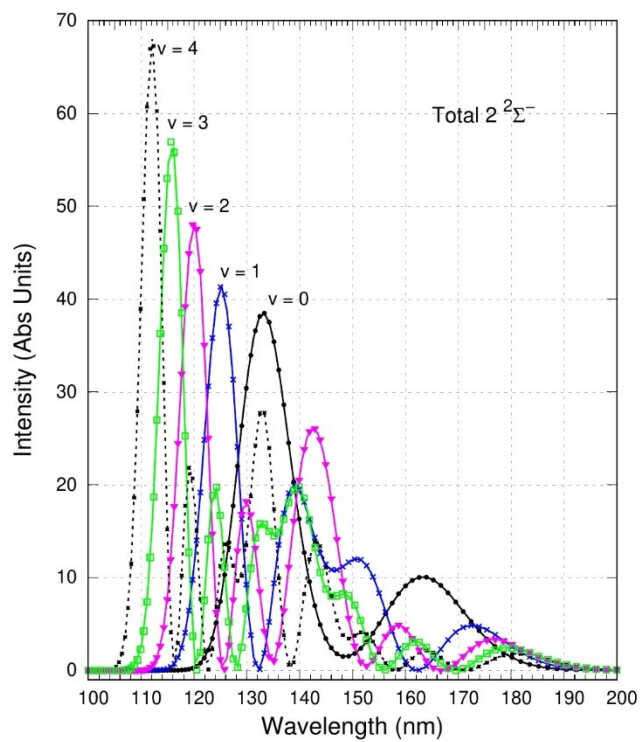

Fig. S1 Bound-free emission intensities for doublet states of the hydroxyl dication.
